# Supplementary material
Source: PubMed Central journal article supplement (PMC9281606)
Supplement: cn1c00653_si_001.pdf [file cn1c00653_si_001.pdf]

**Supporting Information**

**Distinct Dibasic Cleavage Specificities of Neuropeptide-Producing Cathepsin L and  
Cathepsin V Cysteine Proteases Compared to PC1/3 and PC2 Serine Proteases**

Michael Yoon<sup>1</sup>, Janneca Ames<sup>1</sup>, Charles Mosier<sup>1</sup>, Zhenze Jiang<sup>1</sup>, Sonia Podvin<sup>1</sup>  
Anthony J. O'Donoghue<sup>1</sup>, and Vivian Hook<sup>1,2</sup>

<sup>1</sup>Skaggs School of Pharmacy and Pharmaceutical Sciences, University of California, San Diego,  
La Jolla, CA 92093, United States:

<sup>2</sup>Department of Neurosciences and Department of Pharmacology, University of California, San  
Diego, La Jolla, CA 92093, United States

## Supplemental Information

## Supplementary Figures:

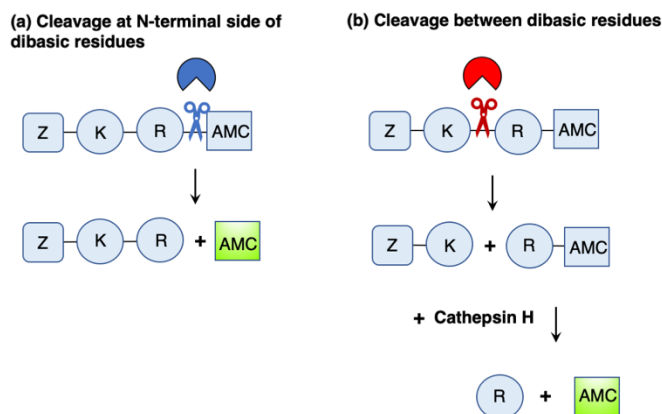

**Figure S1. Coupled protease assay with cathepsin H aminopeptidase activity to monitor peptide-AMC cleavages with N-terminal residue-extended AMC products.**

a. C-terminal cleavage at dibasic residues of Z-K-R-AMC, as an example of the Z-K/R-K/R- $\downarrow$ AMC and Z-X-K/R-K/R- $\downarrow$ AMC substrates, generates fluorescent AMC monitored at excitation/emission of 360/460 nm, shown here for Z-K-R-AMC as example.

b. Cleavage between or at the N-terminal side of dibasic residues of Z-K-R-AMC, as an example for the Z-K/R-K/R- $\downarrow$ AMC and Z-X-K/R-K/R- $\downarrow$ AMC substrates, generates basic residue extended AMC products that are monitored by addition of the cathepsin H aminopeptidase to generate fluorescent AMC for detection and quantitation of cleaved products.

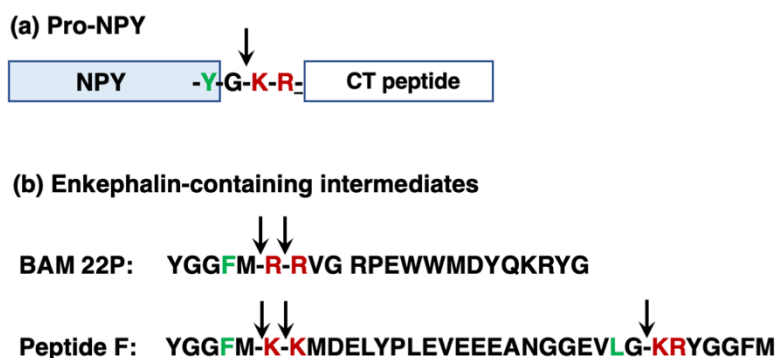

**Figure S2. Cathepsin L cleavage of several pro-neuropeptides at dibasic residues, between and at the N-terminal side, reported in the literature.**

a. Cathepsin L cleavage of pro-NPY. Cathepsin L cleavage of recombinant pro-NPY was determined by mass spectrometry analyses of cleavage products, as reported by our prior study of Funkelstein et al., 2008 (21). Results indicated cathepsin L cleavage at the N-terminal side of the KR (pink) processing site, with hydrophobic Tyr residue (green).

b. Cathepsin L cleavage of enkephalin-containing intermediates BAM22P and Peptide F. Cathepsin L cleavage of BAM22P and Peptide F was determined by mass spectrometry analyses of cleavage products, as reported in our prior study of Yasothornsrikul et al., 2003 (20). Results demonstrated cathepsin L cleavage between the R $\downarrow$ R dibasic site, and at the N-terminal side of  $\downarrow$ RR with hydrophobic Tyr as P2 residue.

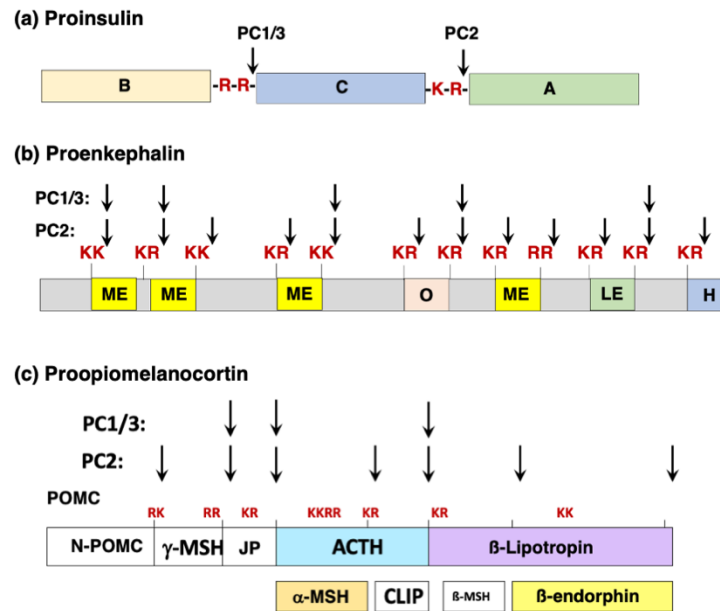

**Figure S3. PC1/3 and PC2 cleavage of proinsulin and proenkephalin at the N-terminal side of dibasic residues, reported in the literature.**

(a) Proinsulin processing by PC1/3 and PC2. PC1/3 (human) has been demonstrated to cleave human proinsulin at the C-terminal side of RR↓ between the B and C chains, as reported by Davidson et al., 1988 (22). PC2 (human) has been shown to cleave at the COOH-terminal side of KR↓ between the C and A chains of proinsulin (22).

(b) Proenkephalin processing by PC1/3 and PC2. Processing of proenkephalin (rat) by PC1/3 and PC2 (mouse) was conducted by analyses of peptide products by MALDI-TOF, as reported by Peinado et al., 2003 (26). Arrows indicate the cleavage sites within proenkephalin by PC1/3 and PC2.

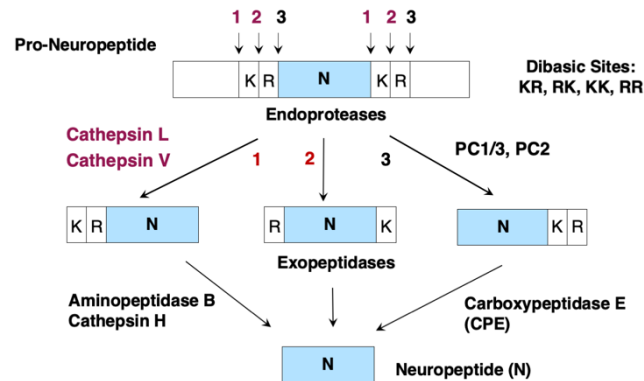

**Figure S4. Hypothesis for differential dibasic cleavage specificities of the cathepsin L and cathepsin V cysteine proteases, compared to the PC1/3 and PC2 serine proteases, for neuropeptide biosynthesis.**

Neuropeptides comprise peptide neurotransmitters and hormones. Neuropeptides are first synthesized as pro-neuropeptide precursors with dibasic residues (KR, RK, KK, and RR) flanking the active neuropeptides. The dibasic residue regions have been found to undergo proteolytic processing by cathepsin L and cathepsin V cysteine proteases (1, 2), combined with the pro-protein convertases 1 and 2 (PC1/3 and PC2) (1-3). It is hypothesized that different cleavage specificities exist for the cathepsin L and cathepsin V proteases which cleave between and at the N-terminal side of the dibasic residues, whereas the PC1/3 and PC2 serine proteases cleave at the C-terminal side of dibasic residues. This hypothesis is supported by the findings of this study.

## Supplemental Table:

|    | 14-mers with dibasic sequence (n=19) |
|----|--------------------------------------|
| 1  | nLDKLnNWPQRRGn                       |
| 2  | GnYYKRFnAHWVGI                       |
| 3  | QnKKTLVnYNEWNL                       |
| 4  | LGWHAnFRKYPI nA                      |
| 5  | GSQVFSWLNHYHRK                       |
| 6  | HTNKRISQWnWEIR                       |
| 7  | RKWQSPQVDLYDKS                       |
| 8  | HRRVYLTSKPAPES                       |
| 9  | VDYIEHKDQVRnN                        |
| 10 | nEFHWRInQGKKAP                       |
| 11 | TPHHVNWYKRAPNQ                       |
| 12 | EGADIWYRKHSHQL                       |
| 13 | LRKDWGDIQFATAN                       |
| 14 | IEPPWVDSHAKRnN                       |
| 15 | YQLLTnNEIFRKWH                       |
| 16 | YWnSTHLAGKRRDW                       |
| 17 | DAWAPnVIKKESSI                       |
| 18 | ADARKYWNVHGTHQ                       |
| 19 | ANnQILDPDFNFKRE                      |

**Table S1. Dibasic residue containing peptides in the library of 228 14-mer peptides used for MSP-MS analyses.**

The sequences of 14-mer peptides of the library that contain dibasic residues are shown. The library also contained one tribasic peptide.

## Supplemental Methods

### LC-MS-MS Report:

#### MSP-MS of Cathepsin L, Cathepsin V, PC1/3, and PC2 at pH 5.5 and pH 7.4

Samples were resuspended in 0.1% TFA to a total peptide concentration of 28.5 µM  
Each sample were injected once, 4 ul total volume per injection

The C18 column consisted of 1.7 µm bead size, 75 µm x 20 cm, heated to 65C

Solvent A – water, 0.1% formic acid

Solvent B – acetonitrile, 0.1% formic acid

Nano-LC gradient:

| A          | B             | C           | D           |
|------------|---------------|-------------|-------------|
| Time (min) | Flow (µl/min) | % solvent A | % solvent B |
| 0          | 0.3           | 99          | 1           |
| 0.1        | 0.3           | 95          | 5           |
| 60         | 0.3           | 70          | 30          |
| 65         | 0.3           | 15          | 85          |
| 75         | 0.3           | 15          | 85          |
| 75.1       | 0.3           | 10          | 90          |
| 85         | 0.3           | 10          | 90          |
| 85.1       | 0.3           | 0           | 100         |

### MS Sample List

|                             |                            |
|-----------------------------|----------------------------|
| MY 20180821 CatV74 60 4.raw | MY 20180821 PC1 60 4.raw   |
| MY 20180821 CatV74 60 3.raw | MY 20180821 PC1 60 3.raw   |
| MY 20180821 CatV74 60 2.raw | MY 20180821 PC1 60 2.raw   |
| MY 20180821 CatV74 60 1.raw | MY 20180821 PC1 60 1.raw   |
| MY 20180821 CatV74 30 4.raw | MY 20180821 PC1 30 4.raw   |
| MY 20180821 CatV74 30 3.raw | MY 20180821 PC1 30 3.raw   |
| MY 20180821 CatV74 30 2.raw | MY 20180821 PC1 30 2.raw   |
| MY 20180821 CatV74 30 1.raw | MY 20180821 PC1 30 1.raw   |
| MY 20180821 CatV55 60 4.raw | MY 20180821 PC1 0 4.raw    |
| MY 20180821 CatV55 60 3.raw | MY 20180821 PC1 0 3.raw    |
| MY 20180821 CatV55 60 2.raw | MY 20180821 PC1 0 2.raw    |
| MY 20180821 CatV55 60 1.raw | MY 20180821 PC1 0 1.raw    |
| MY 20180821 CatV55 30 4.raw | MY 20180821 PC2 60 4.raw   |
| MY 20180821 CatV55 30 3.raw | MY 20180821 PC2 60 3.raw   |
| MY 20180821 CatV55 30 2.raw | MY 20180821 PC2 60 2.raw   |
| MY 20180821 CatV55 30 1.raw | MY 20180821 PC2 60 1.raw   |
| MY 20180821 CatV55 0 4.raw  | MY 20180821 PC2 30 4.raw   |
| MY 20180821 CatV55 0 3.raw  | MY 20180821 PC2 30 3.raw   |
| MY 20180821 CatV55 0 2.raw  | MY 20180821 PC2 30 2.raw   |
| MY 20180821 CatV55 0 1.raw  | MY 20180821 PC2 30 1.raw   |
| MY 20180821 CatL55 60 4.raw | MY 20180821 PC2 0 4.raw    |
| MY 20180821 CatL55 60 3.raw | MY 20180821 PC2 0 3.raw    |
| MY 20180821 CatL55 60 2.raw | MY 20180821 PC2 0 2.raw    |
| MY 20180821 CatL55 60 1.raw | MY 20180821 PC2 0 1.raw    |
| MY 20180821 CatL55 30 4.raw | MY 20180821 CatL55 0 1.raw |
| MY 20180821 CatL55 30 3.raw | MY 20180821 CatL55 0 4.raw |
| MY 20180821 CatL55 30 2.raw | MY 20180821 CatL55 0 3.raw |
| MY 20180821 CatL55 30 1.raw | MY 20180821 CatL55 0 2.raw |

Q-Exactive MS Report: Thermo Scientific SII for Xcalibur Method – Next Pages

**Method of Q Exactive****Overall method settings****Global Settings**

|                          |      |
|--------------------------|------|
| Use lock masses          | off  |
| Lock mass injection      | —    |
| Chrom. peak width (FWHM) | 15 s |

**Time**

|                 |           |
|-----------------|-----------|
| Method duration | 95.00 min |
|-----------------|-----------|

**Customized Tolerances (+/-)**

|                   |          |
|-------------------|----------|
| Lock Masses       | —        |
| Inclusion         | —        |
| Exclusion         | —        |
| Neutral Loss      | —        |
| Mass Tags         | —        |
| Dynamic Exclusion | 10.0 ppm |

**Experiment****Full MS / dd-MS<sup>2</sup> (TopN)****General**

|                      |             |
|----------------------|-------------|
| Runtime              | 0 to 95 min |
| Polarity             | Positive    |
| In-source CID        | 0.0 eV      |
| Default charge state | 2           |
| Inclusion            | —           |
| Exclusion            | —           |
| Tags                 | —           |

**Full MS**

|                       |                 |
|-----------------------|-----------------|
| Microscans            | 1               |
| Resolution            | 70,000          |
| AGC target            | 3e6             |
| Maximum IT            | 100 ms          |
| Number of scan ranges | 1               |
| Scan range            | 250 to 1500 m/z |
| Spectrum data type    | Profile         |

**dd-MS<sup>2</sup> / dd-SIM**

|                       |                 |
|-----------------------|-----------------|
| Microscans            | 1               |
| Resolution            | 17,500          |
| AGC target            | 1e5             |
| Maximum IT            | 50 ms           |
| Loop count            | 12              |
| MSX count             | 1               |
| TopN                  | 12              |
| Isolation window      | 1.5 m/z         |
| Isolation offset      | 0.0 m/z         |
| Scan range            | 200 to 2000 m/z |
| Fixed first mass      | 150.0 m/z       |
| (N)CE / stepped (N)CE | nce: 28         |
| Spectrum data type    | Centroid        |

**dd Settings**

|                     |               |
|---------------------|---------------|
| Minimum AGC target  | 3.00e2        |
| Intensity threshold | 6.0e3         |
| Apex trigger        | —             |
| Charge exclusion    | unassigned, 1 |

Peptide match Preferred  
 Exclude isotopes fc on  
 Dynamic exclusion 20.0 s  
 If idle .. do not pick others

### **Setup**

#### **Tunefiles**

##### **General**

Switch Count 0  
 Base Tunefile C:\Xcalibur\methods\CL\_nanoTune\_20180409.mstune

#### **Contact Closure**

##### **General**

Used False  
 Start in Closed True  
 Switch Count 0

#### **Syringe**

##### **General**

Used False  
 Start in OFF True  
 Stop at end of run False  
 Switch Count 0

##### **Pump setup**

Syringe type Hamilton  
 Flow rate 3.000 µL/min  
 Inner diameter 2.303 mm  
 Volume 250 µL

#### **Divert Valve A**

##### **General**

Used False  
 Start in 1-2 True  
 Switch Count 0

#### **Divert Valve B**

##### **General**

Used False  
 Start in 1-2 True  
 Switch Count 0

#### **Lock Masses**

*(no entries)*

#### **Inclusion List**

*(no entries)*

#### **Exclusion List**

*(no entries)*

#### **Neutral Losses**

*(no entries)*

#### **Mass Tags**

*(no entries)*

# 1. Notes

## 2. Result Statistics

**Figure 1.** False discovery rate (FDR) curve. X axis is the number of peptide-spectrum matches (PSM) being kept. Y axis is the corresponding FDR. [?](#)

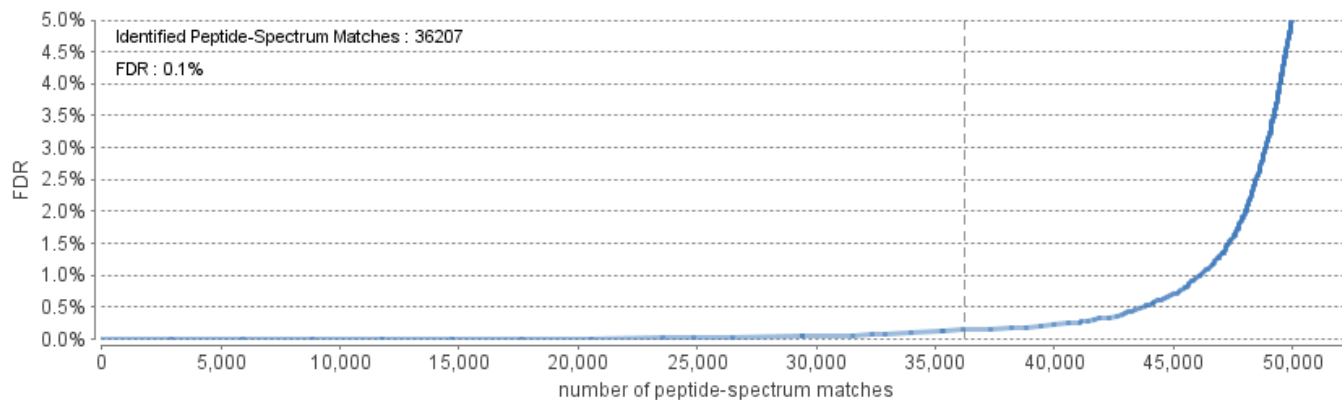

**Figure 2.** PSM score distribution. (a) Distribution of PEAKS peptide score; (b) Scatterplot of PEAKS peptide score versus precursor mass error. [?](#)

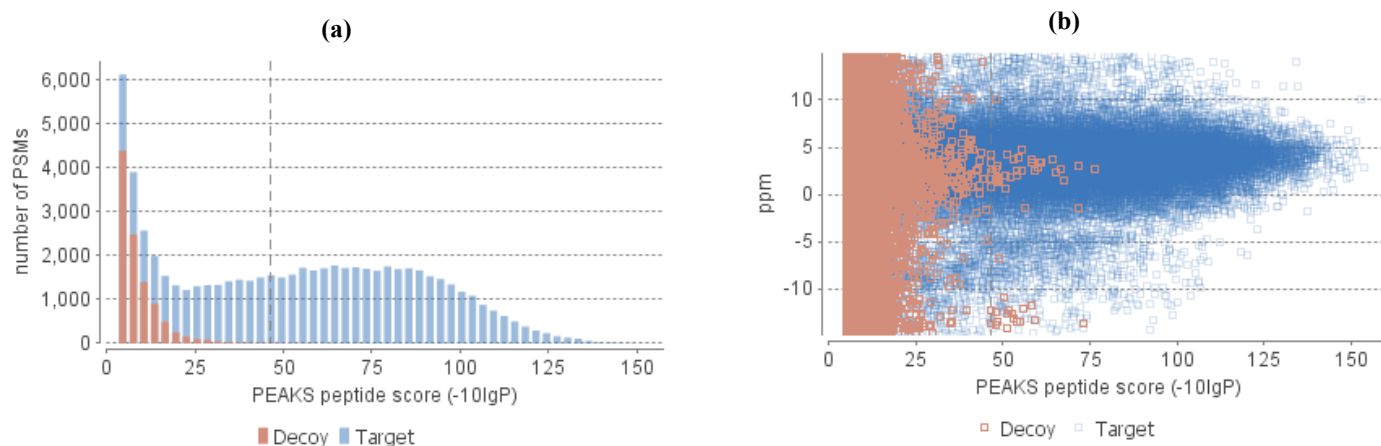

**Figure 3.** De novo result validation. Distribution of residue local confidence: (a) Residues in de novo sequences validated by confident database peptide assignment; (b) Residues in "de novo only" sequences. [?](#)

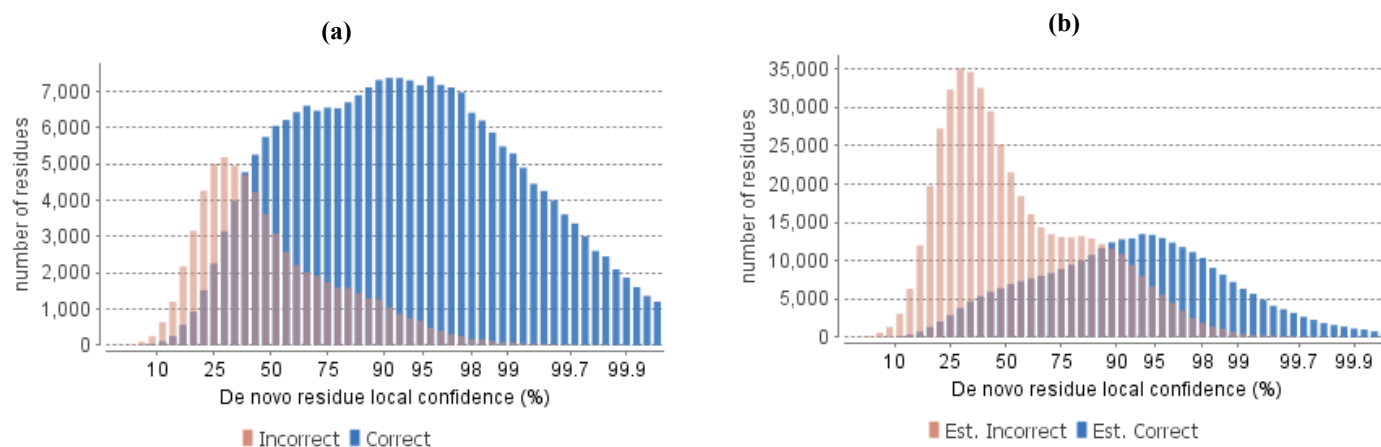



**Table 1.** Statistics of data.

# of MS scans 183611  
# of MS/MS scans 1009554

**Table 2.** Result filtration parameters.

Peptide -10lgP  $\geq 46.4$   
Peptide Ascore  $\geq 0$   
Protein -10lgP  $\geq 20$   
Proteins unique peptides  $\geq 0$   
De novo ALC Score  $\geq 50\%$

**Table 3.** Statistics of filtered result.

Peptide-Spectrum Matches 36207  
Peptide sequences 1144  
Protein groups 402  
Proteins 402  
Proteins (#Unique Peptides) 189 (>2); 12 (=2); 14 (=1);  
FDR (Peptide-Spectrum Matches) 0.1%  
FDR (Peptide Sequences) 0.9%  
FDR (Protein) 85.3%  
De Novo Only Spectra 59514

**Table 4.** PTM profile.

| Name | $\Delta$ Mass | Position | #PSM | -10lgP | Area | AScore |
|------|---------------|----------|------|--------|------|--------|
|------|---------------|----------|------|--------|------|--------|

### 3. Experiment Control

**Figure 4.** Precursor mass error of peptide-spectrum matches (PSM) in filtered result. **(a)** Distribution of precursor mass error in ppm; **(b)** Scatterplot of precursor m/z versus precursor mass error in ppm. [?](#)

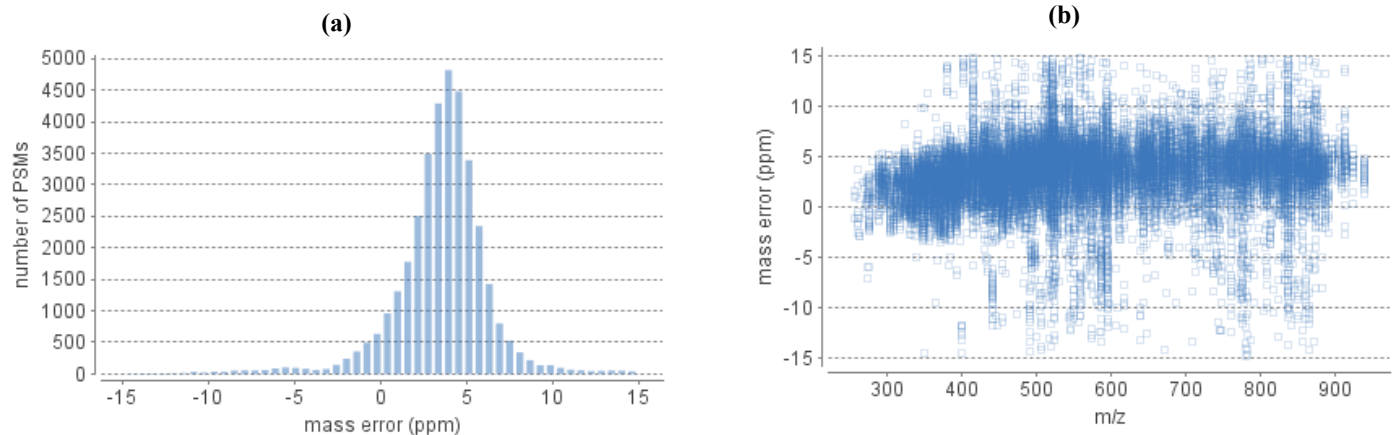**Table 5.** Number of identified peptides in each sample by the number of missed cleavages

| Missed Cleavages | 0 | 1 | 2 | 3 | 4+  |
|------------------|---|---|---|---|-----|
| L_0_55_1         | 0 | 0 | 0 | 0 | 23  |
| L_0_55_2         | 0 | 0 | 0 | 0 | 29  |
| L_0_55_3         | 0 | 0 | 0 | 0 | 92  |
| L_0_55_4         | 0 | 0 | 0 | 0 | 21  |
| L_30_55_1        | 0 | 0 | 0 | 0 | 19  |
| L_30_55_2        | 0 | 0 | 0 | 0 | 9   |
| L_30_55_3        | 0 | 0 | 0 | 0 | 26  |
| L_30_55_4        | 0 | 0 | 0 | 0 | 118 |
| L_60_55_1        | 0 | 0 | 0 | 0 | 166 |
| L_60_55_2        | 0 | 0 | 0 | 0 | 65  |

## 4. Other Information

### Table 6. Search parameters.

Search Engine Name: PEAKS  
Parent Mass Error Tolerance: 15.0 ppm  
Fragment Mass Error Tolerance: 0.01 Da  
Precursor Mass Search Type: monoisotopic  
Enzyme: None  
Max Missed Cleavages: 100  
Non-specific Cleavage: both  
Max Variable PTM Per Peptide: 3  
Database: TDP\_237library\_07202017  
Taxon: All  
Searched Entry: 228  
FDR Estimation: Enabled  
Different data refine parameters are used for this search:

### Table 7. Instrument parameters.

Fractions: MY\_20180821\_CatL55\_0\_1.raw, MY\_20180821\_CatL55\_0\_2.raw, MY\_20180821\_CatL55\_0\_3.raw, MY\_20180821\_CatL55\_0\_4.raw, MY\_20180821\_CatL55\_30\_1.raw, MY\_20180821\_CatL55\_30\_2.raw, MY\_20180821\_CatL55\_30\_3.raw, MY\_20180821\_CatL55\_30\_4.raw, MY\_20180821\_CatL55\_60\_1.raw, MY\_20180821\_CatL55\_60\_2.raw, MY\_20180821\_CatL55\_60\_3.raw, MY\_20180821\_CatL55\_60\_4.raw, MY\_20180821\_CatV55\_0\_1.raw, MY\_20180821\_CatV55\_0\_2.raw, MY\_20180821\_CatV55\_0\_3.raw, MY\_20180821\_CatV55\_0\_4.raw, MY\_20180821\_CatV55\_30\_1.raw, MY\_20180821\_CatV55\_30\_2.raw, MY\_20180821\_CatV55\_30\_3.raw, MY\_20180821\_CatV55\_30\_4.raw, MY\_20180821\_CatV55\_60\_1.raw, MY\_20180821\_CatV55\_60\_2.raw, MY\_20180821\_CatV55\_60\_3.raw, MY\_20180821\_CatV55\_60\_4.raw, MY\_20180821\_CatV74\_30\_1.raw, MY\_20180821\_CatV74\_30\_2.raw, MY\_20180821\_CatV74\_30\_3.raw, MY\_20180821\_CatV74\_30\_4.raw, MY\_20180821\_CatV74\_60\_1.raw, MY\_20180821\_CatV74\_60\_2.raw, MY\_20180821\_CatV74\_60\_3.raw, MY\_20180821\_CatV74\_60\_4.raw  
Ion Source: ESI(nano-spray)  
Fragmentation Mode: high energy CID (y and b ions)  
MS Scan Mode: FT-ICR/Orbitrap  
MS/MS Scan Mode: FT-ICR/Orbitrap

# 1. Notes

## 2. Result Statistics

**Figure 1.** False discovery rate (FDR) curve. X axis is the number of peptide-spectrum matches (PSM) being kept. Y axis is the corresponding FDR.

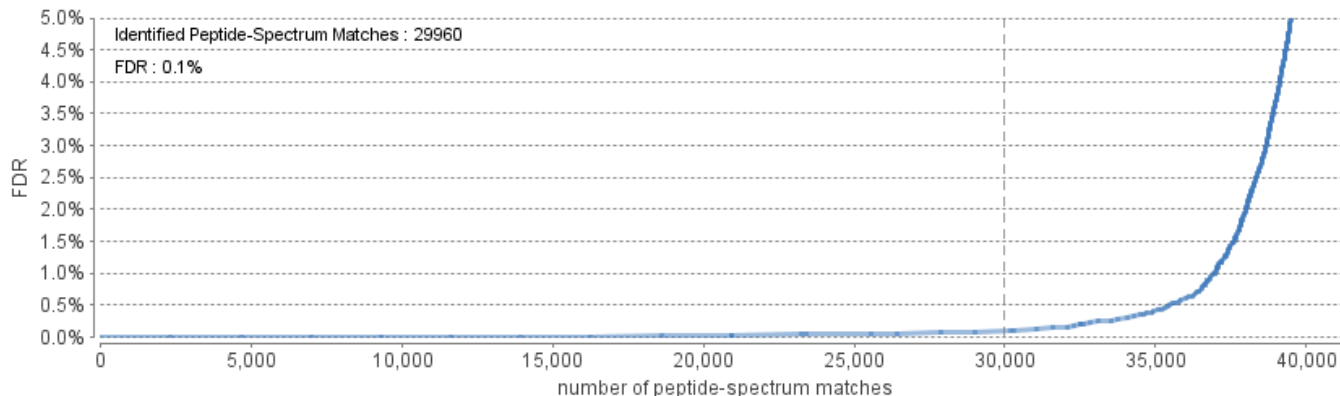

**Figure 2.** PSM score distribution. (a) Distribution of PEAKS peptide score; (b) Scatterplot of PEAKS peptide score versus precursor mass error.

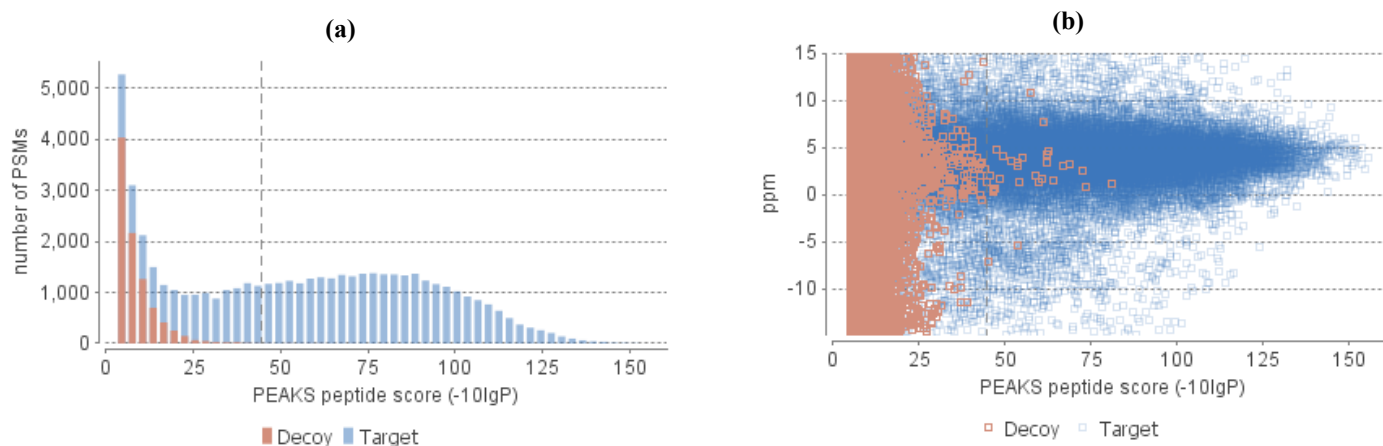

**Figure 3.** De novo result validation. Distribution of residue local confidence: (a) Residues in de novo sequences validated by confident database peptide assignment; (b) Residues in "de novo only" sequences.

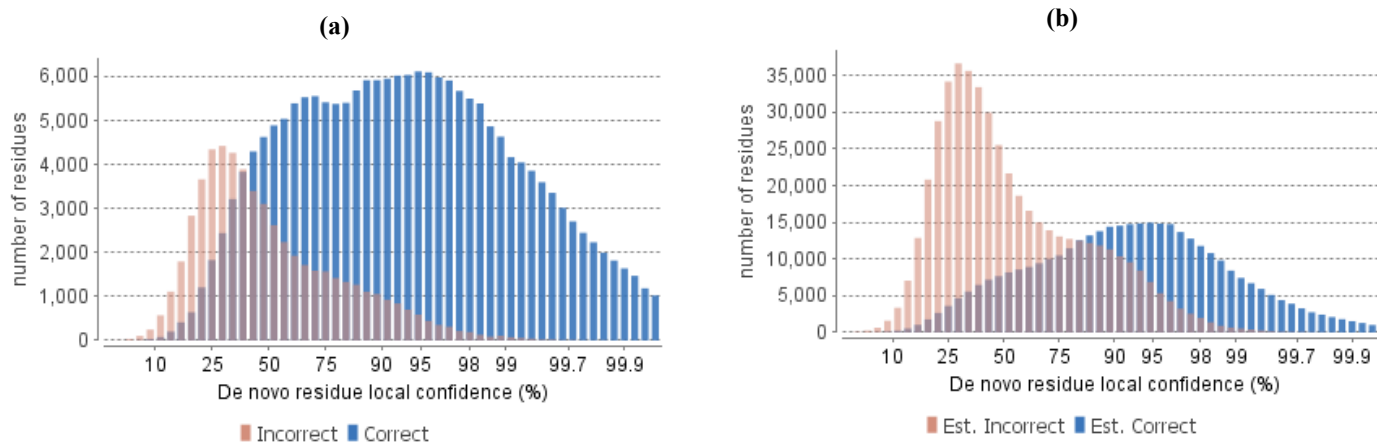

**Table 1.** Statistics of data.

# of MS scans 133047  
# of MS/MS scans 780106

**Table 2.** Result filtration parameters.

Peptide -10lgP  $\geq 44.7$   
Peptide AScore  $\geq 0$   
Protein -10lgP  $\geq 20$   
Proteins unique peptides  $\geq 0$   
De novo ALC Score  $\geq 50\%$

**Table 3.** Statistics of filtered result.

Peptide-Spectrum Matches 29960  
Peptide sequences 887  
Protein groups 393  
Proteins 393  
Proteins (#Unique Peptides) 152 (>2); 44 (=2); 20 (=1);  
FDR (Peptide-Spectrum Matches) 0.1%  
FDR (Peptide Sequences) 0.9%  
FDR (Protein) 80.3%  
De Novo Only Spectra 62036

**Table 4.** PTM profile.

| Name | $\Delta$ Mass | Position | #PSM | -10lgP | Area | AScore |
|------|---------------|----------|------|--------|------|--------|
|------|---------------|----------|------|--------|------|--------|

### 3. Experiment Control

**Figure 4.** Precursor mass error of peptide-spectrum matches (PSM) in filtered result. **(a)** Distribution of precursor mass error in ppm; **(b)** Scatterplot of precursor m/z versus precursor mass error in ppm. [?](#)

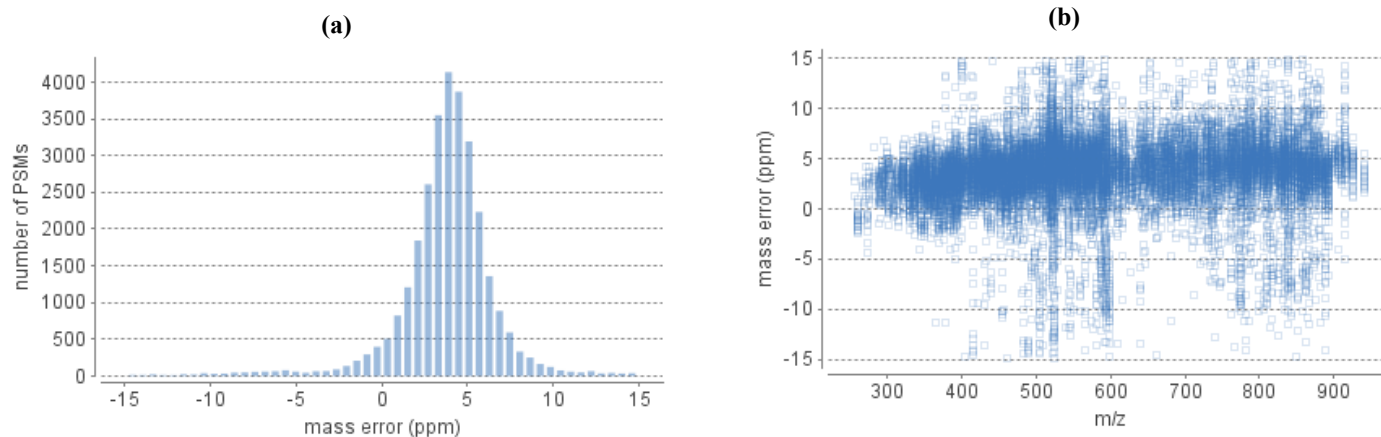**Table 5.** Number of identified peptides in each sample by the number of missed cleavages

| Missed Cleavages | 0 | 1 | 2 | 3 | 4+  |
|------------------|---|---|---|---|-----|
| PC1_00_1         | 0 | 0 | 0 | 0 | 61  |
| PC1_00_2         | 0 | 0 | 0 | 0 | 68  |
| PC1_00_3         | 0 | 0 | 0 | 0 | 10  |
| PC1_00_4         | 0 | 0 | 0 | 0 | 16  |
| PC1_30_1         | 0 | 0 | 0 | 0 | 21  |
| PC1_30_2         | 0 | 0 | 0 | 0 | 25  |
| PC1_30_3         | 0 | 0 | 0 | 0 | 17  |
| PC1_30_4         | 0 | 0 | 0 | 0 | 75  |
| PC1_60_1         | 0 | 0 | 0 | 0 | 37  |
| PC1_60_2         | 0 | 0 | 0 | 0 | 111 |

## 4. Other Information

**Table 6.** Search parameters.

Search Engine Name: PEAKS  
Parent Mass Error Tolerance: 15.0 ppm  
Fragment Mass Error Tolerance: 0.01 Da  
Precursor Mass Search Type: monoisotopic  
Enzyme: None  
Max Missed Cleavages: 100  
Non-specific Cleavage: both  
Max Variable PTM Per Peptide: 3  
Database: TDP\_237library\_07202017  
Taxon: All  
Searched Entry: 228  
FDR Estimation: Enabled  
Different data refine parameters are used for this search:

**Table 7.** Instrument parameters.

Fractions: MY\_20180821\_PC1\_0\_1.raw, MY\_20180821\_PC1\_0\_2.raw, MY\_20180821\_PC1\_0\_3.raw, MY\_20180821\_PC1\_0\_4.raw, MY\_20180821\_PC1\_30\_1.raw, MY\_20180821\_PC1\_30\_2.raw, MY\_20180821\_PC1\_30\_3.raw, MY\_20180821\_PC1\_30\_4.raw, MY\_20180821\_PC1\_60\_1.raw, MY\_20180821\_PC1\_60\_2.raw, MY\_20180821\_PC1\_60\_3.raw, MY\_20180821\_PC1\_60\_4.raw, MY\_20180821\_PC2\_0\_1.raw, MY\_20180821\_PC2\_0\_2.raw, MY\_20180821\_PC2\_0\_3.raw, MY\_20180821\_PC2\_0\_4.raw, MY\_20180821\_PC2\_30\_1.raw, MY\_20180821\_PC2\_30\_2.raw, MY\_20180821\_PC2\_30\_3.raw, MY\_20180821\_PC2\_30\_4.raw, MY\_20180821\_PC2\_60\_1.raw, MY\_20180821\_PC2\_60\_2.raw, MY\_20180821\_PC2\_60\_3.raw, MY\_20180821\_PC2\_60\_4.raw  
Ion Source: ESI(nano-spray)  
Fragmentation Mode: high energy CID (y and b ions)  
MS Scan Mode: FT-ICR/Orbitrap  
MS/MS Scan Mode: FT-ICR/Orbitrap
